# Supplementary material
Source: PubMed Central journal article supplement (PMC9707541)

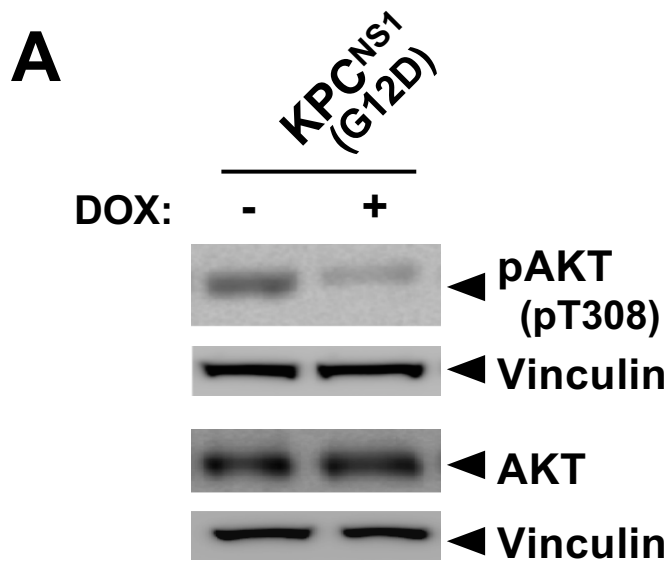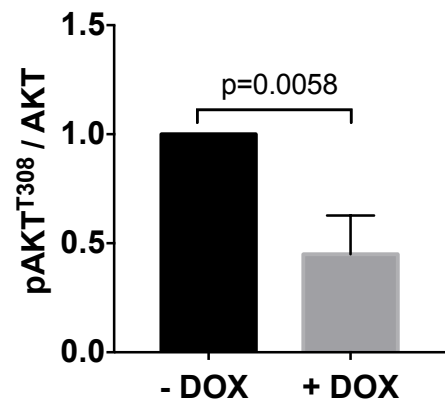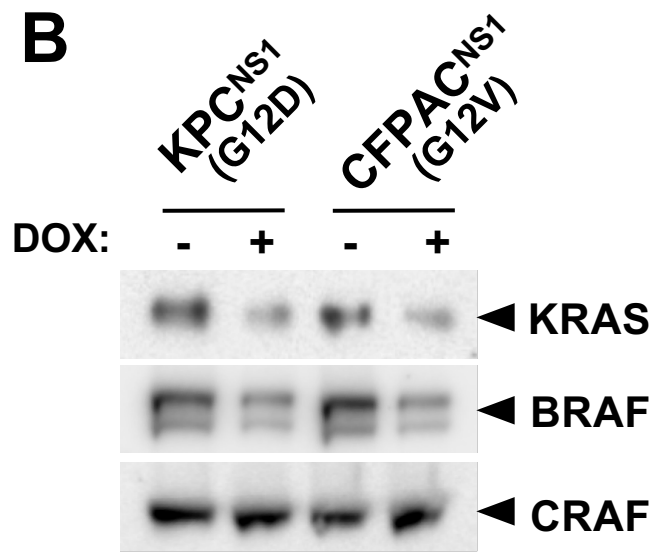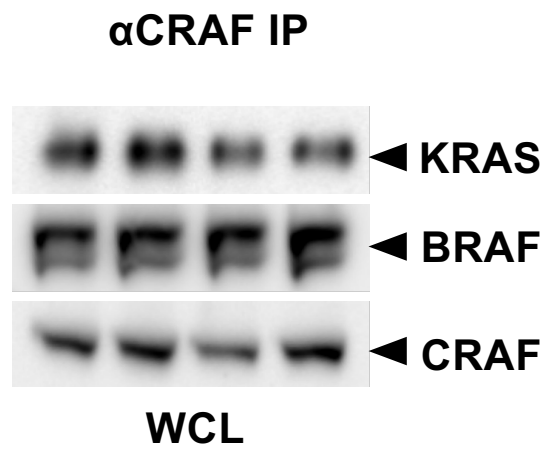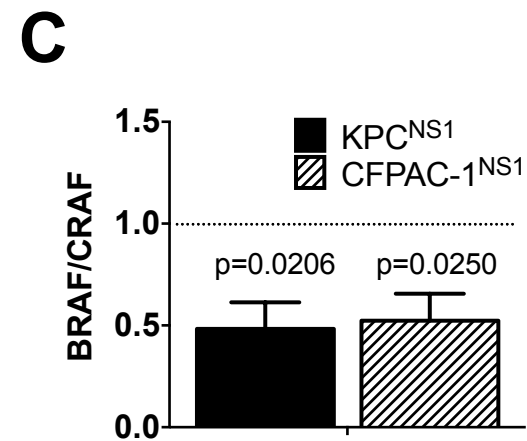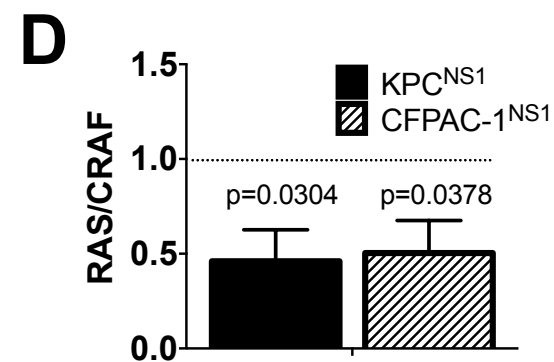

**Extended Figure 1**

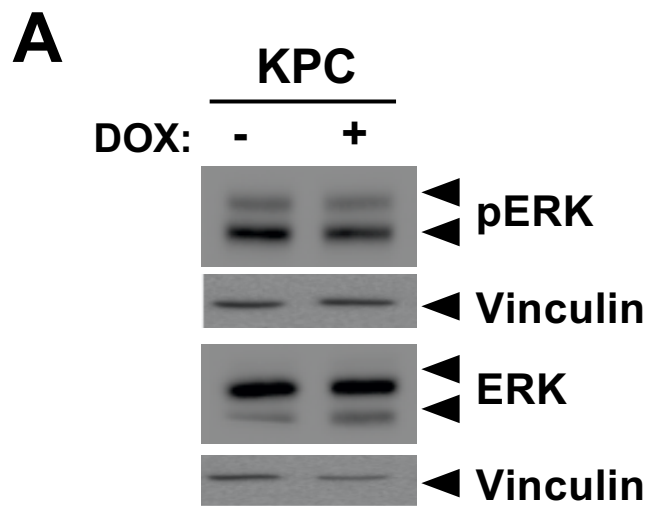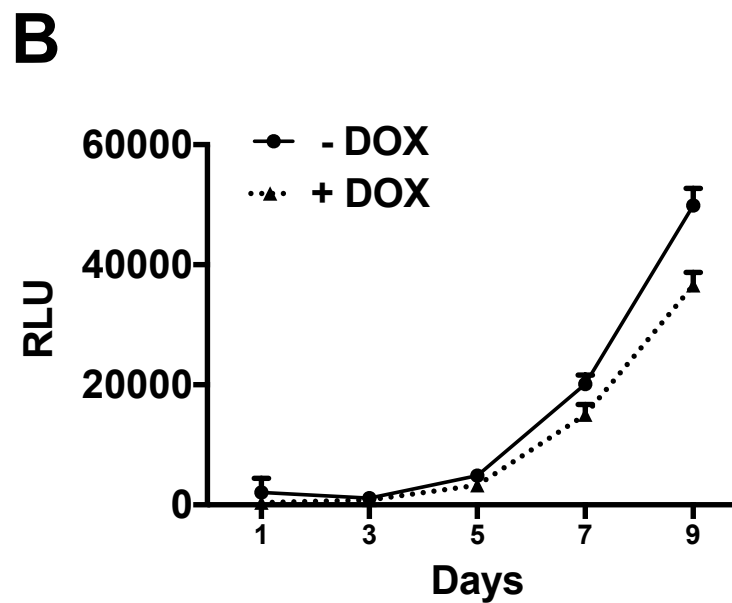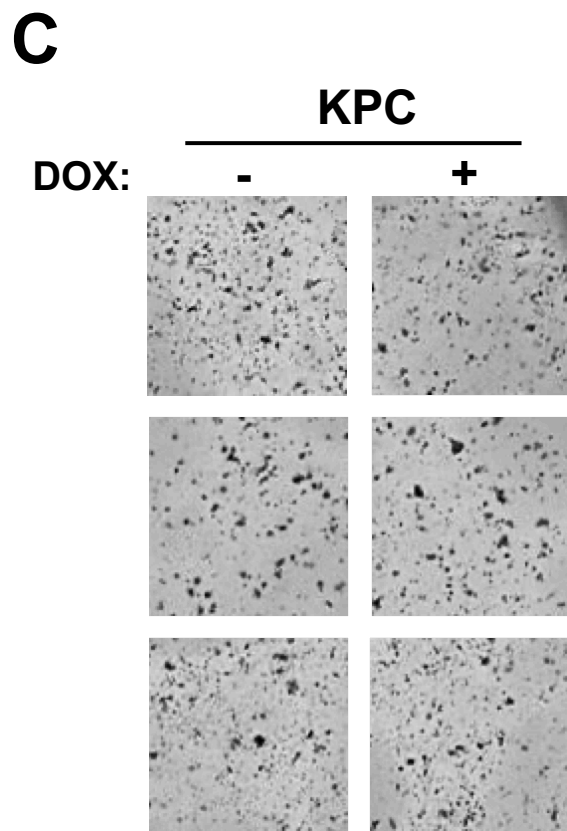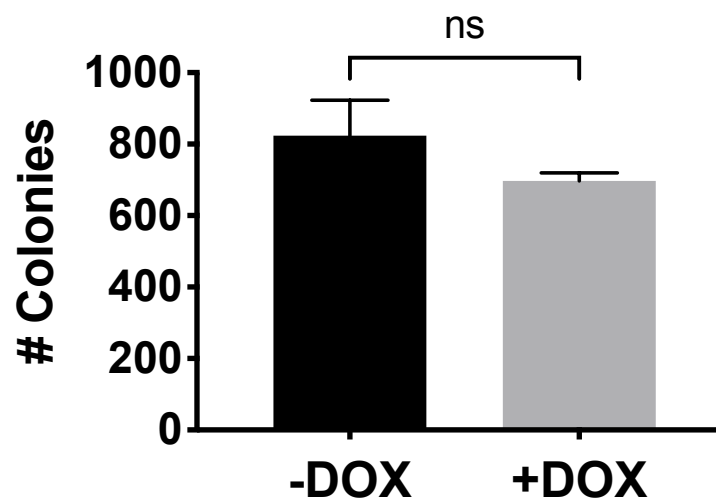

**Extended Figure 2**

**A**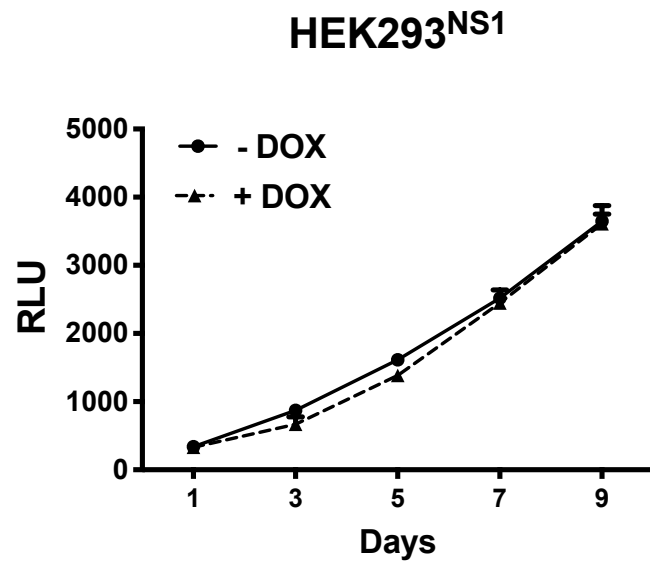**B**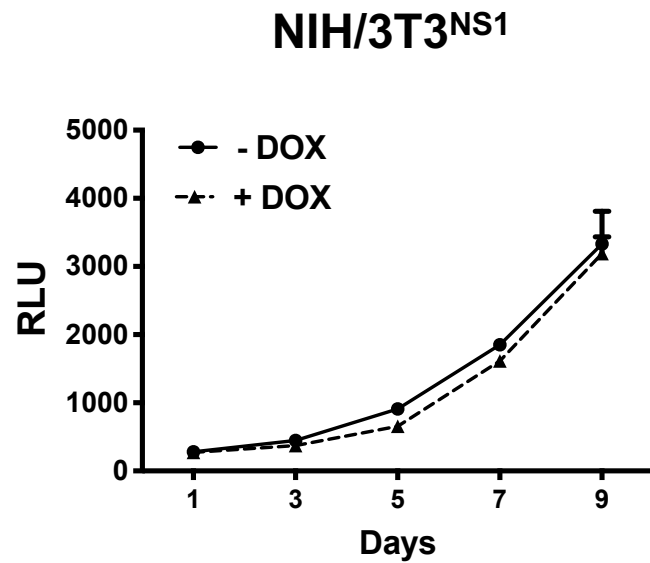**C**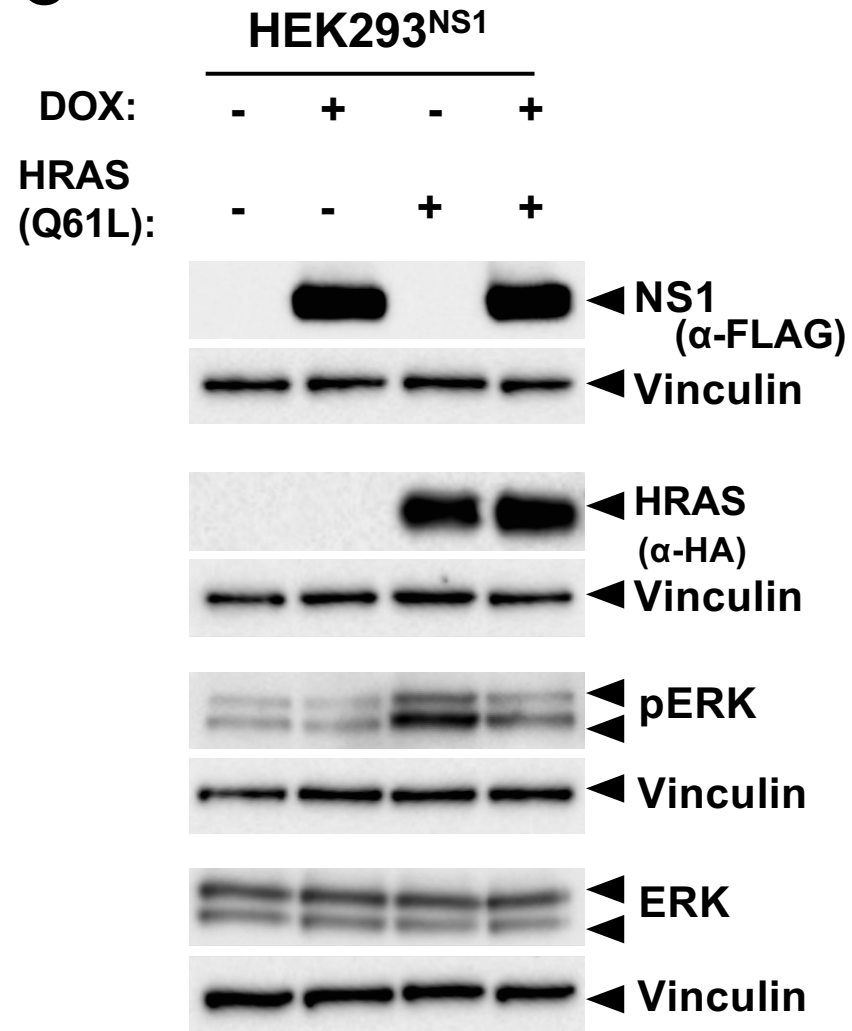**Extended Figure 3**

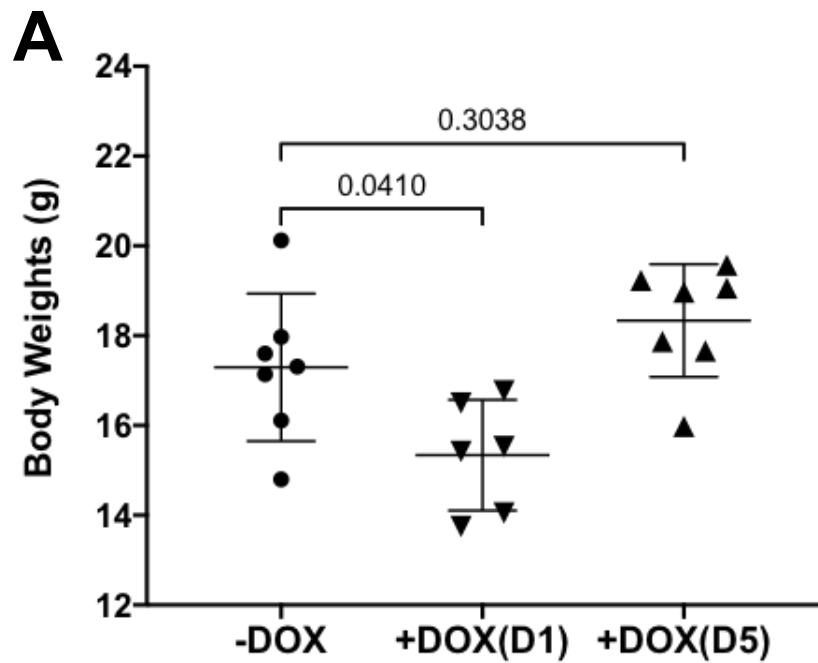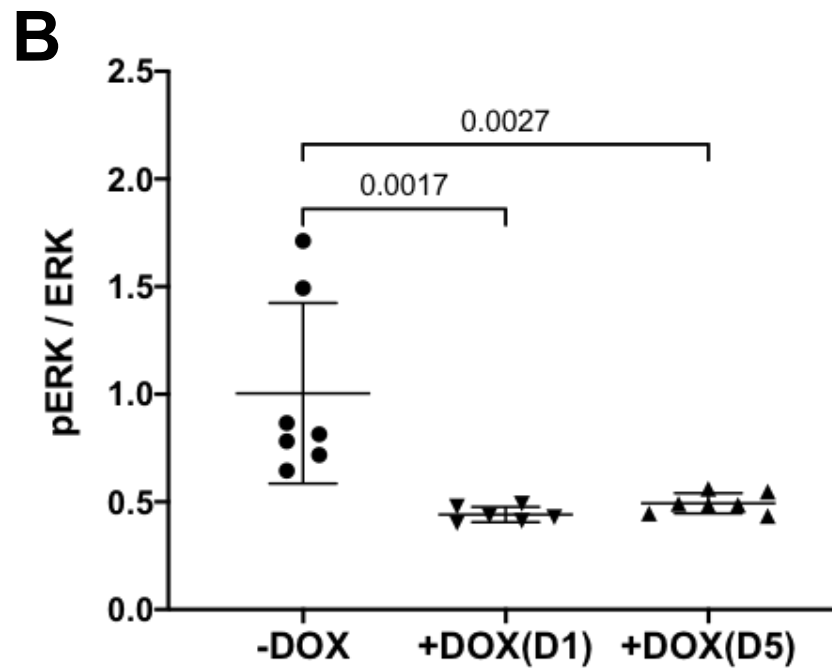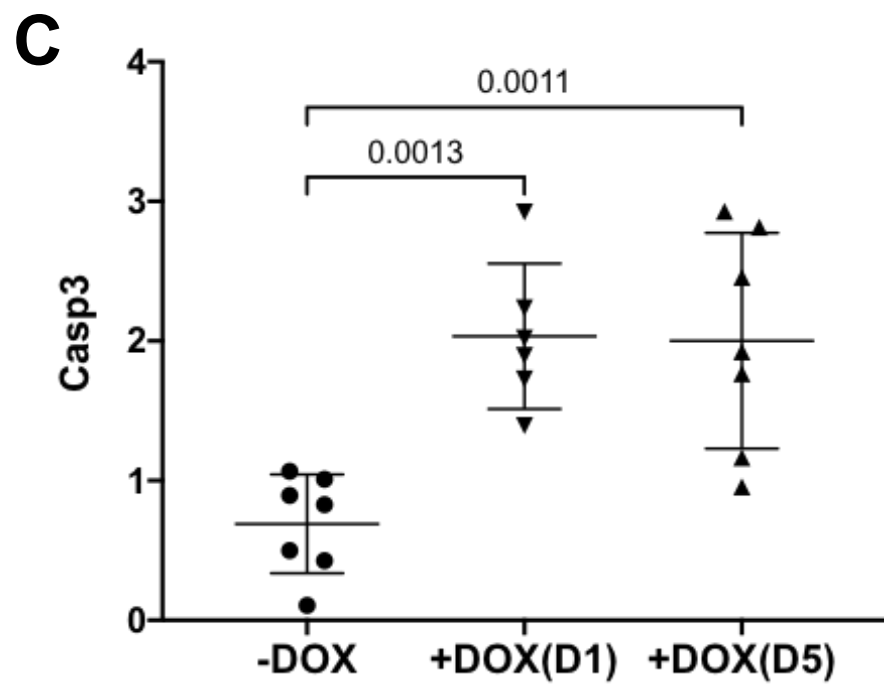

**Extended Figure 4**

**A**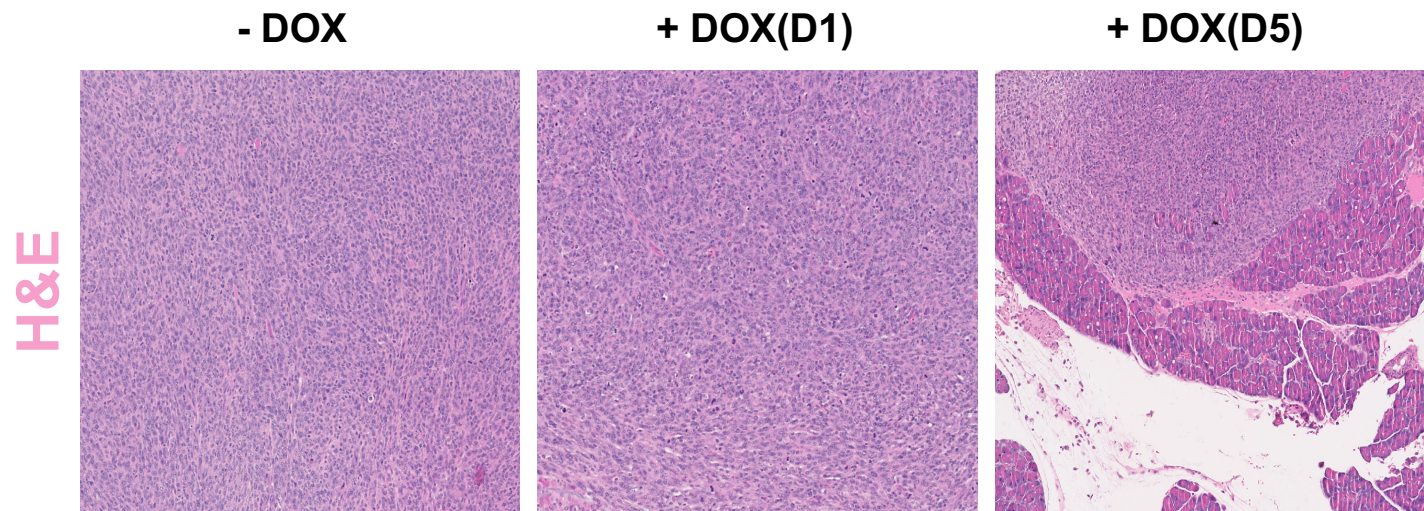**B**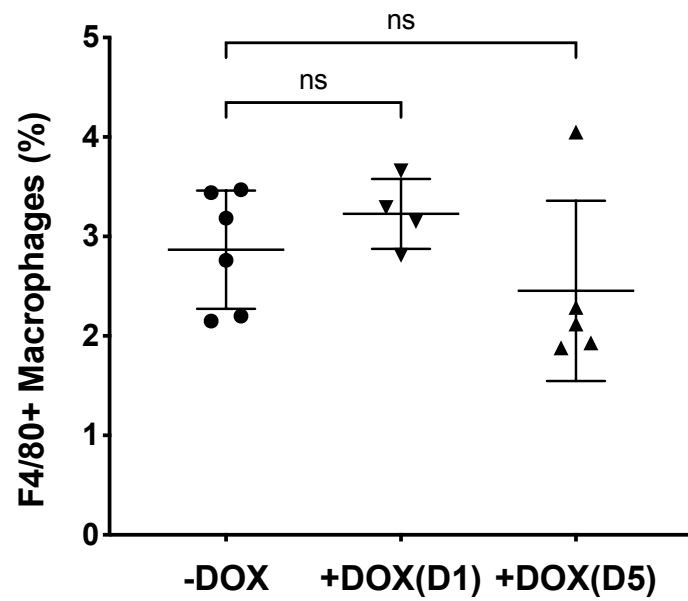**C**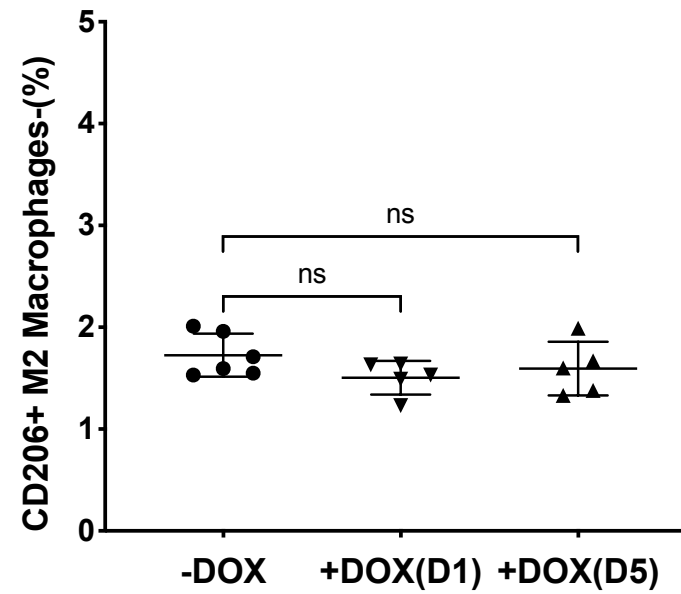**Extended Figure 5**

Supplement: KSGT_A_1906621_SM7378.pdf [file KSGT_A_1906621_SM7378.pdf]
